# Supplementary material for: Rapid assessment of disaster damage using social media activity
Source: PubMed Central journal article supplement — Sci Adv. 2016 Mar 11;2(3):e1500779. doi: 10.1126/sciadv.1500779 (PMC4803483; doi:10.1126/sciadv.1500779), 2016-03-11
Supplement: 1500779_SM.pdf [file 1500779_SM.pdf]

## Supplementary Materials for

### **Rapid assessment of disaster damage using social media activity**

Yury Kryvasheyeu, Haohui Chen, Nick Obradovich, Esteban Moro, Pascal Van Hentenryck, James Fowler, Manuel Cebrian

Published 11 March 2016, *Sci. Adv.* **2**, e1500779 (2016)  
DOI: 10.1126/sciadv.1500779

#### **The PDF file includes:**

Table S1. List of keywords included in the analysis, with their corresponding message counts.

Table S2. Ranking of the keywords included in the analysis according to the strength of the correlation between distance and activity for East Coast cities.

Table S3. Activity-damage correlations across keywords in order of decreasing strength.

Table S4. Effect of normalization variable choice on the strength of activity-damage relationship (ZCTA resolution).

Table S5. County-level estimates of damage: Modeling (Hanus-MH) and ex-post data on insurance and FEMA individual assistance grants.

Table S6. Strength of activity-damage correlations for different damage estimates.

Table S7. Predictive power of sentiment, analyzed at different spatial resolutions and normalized by either area Census population or local Twitter user count (“Twitter population”).

Table S8. List of the disasters considered in the study, with a description of the damage data available for analysis.

Table S9. Effect of the activity threshold filter on the strength of the relationship between Twitter activity and damage.

Table S10. Mutual correlations between sentiment metrics at the level of individual messages.

Table S11. Top-ranking words by frequency of occurrence in positive and negative messages.

Table S12. Sentiment as a predictor of damage: Comparison between metrics.

Fig. S1. Normalized local activity on the topic as a function of distance to the hurricane path.

Fig. S2. Originality of content, expressed through the fraction of retweets in the stream of messages.

Fig. S3. Global popularity of local content.

Fig. S4. Comparison of predictive capacity of activity and sentiment.

Fig. S5. Comparison of activity-damage correlation strength for different precision levels of geo-location.

Fig. S6. Average sentiment trends over time: Comparison between sentiment metrics.

## Supplementary Materials.

**Table S1 List of keywords included in the analysis, with their corresponding message counts.**

| Keyword        | Count     |
|----------------|-----------|
| power          | 4 825 717 |
| sandy          | 4 745 099 |
| hurricane      | 4 680 290 |
| weather        | 3 333 025 |
| storm          | 2 555 196 |
| gas            | 1 991 524 |
| Governor       | 498 135   |
| stay safe      | 484 732   |
| recovery       | 431 591   |
| climate        | 420 217   |
| FEMA           | 329 789   |
| flooding       | 264 132   |
| no power       | 261 998   |
| climate change | 236 009   |
| wall st        | 233 411   |
| blackout       | 213 520   |
| mta            | 206 504   |
| frankenstorm   | 205 467   |
| Cuomo          | 92 014    |
| prayforusa     | 91 293    |

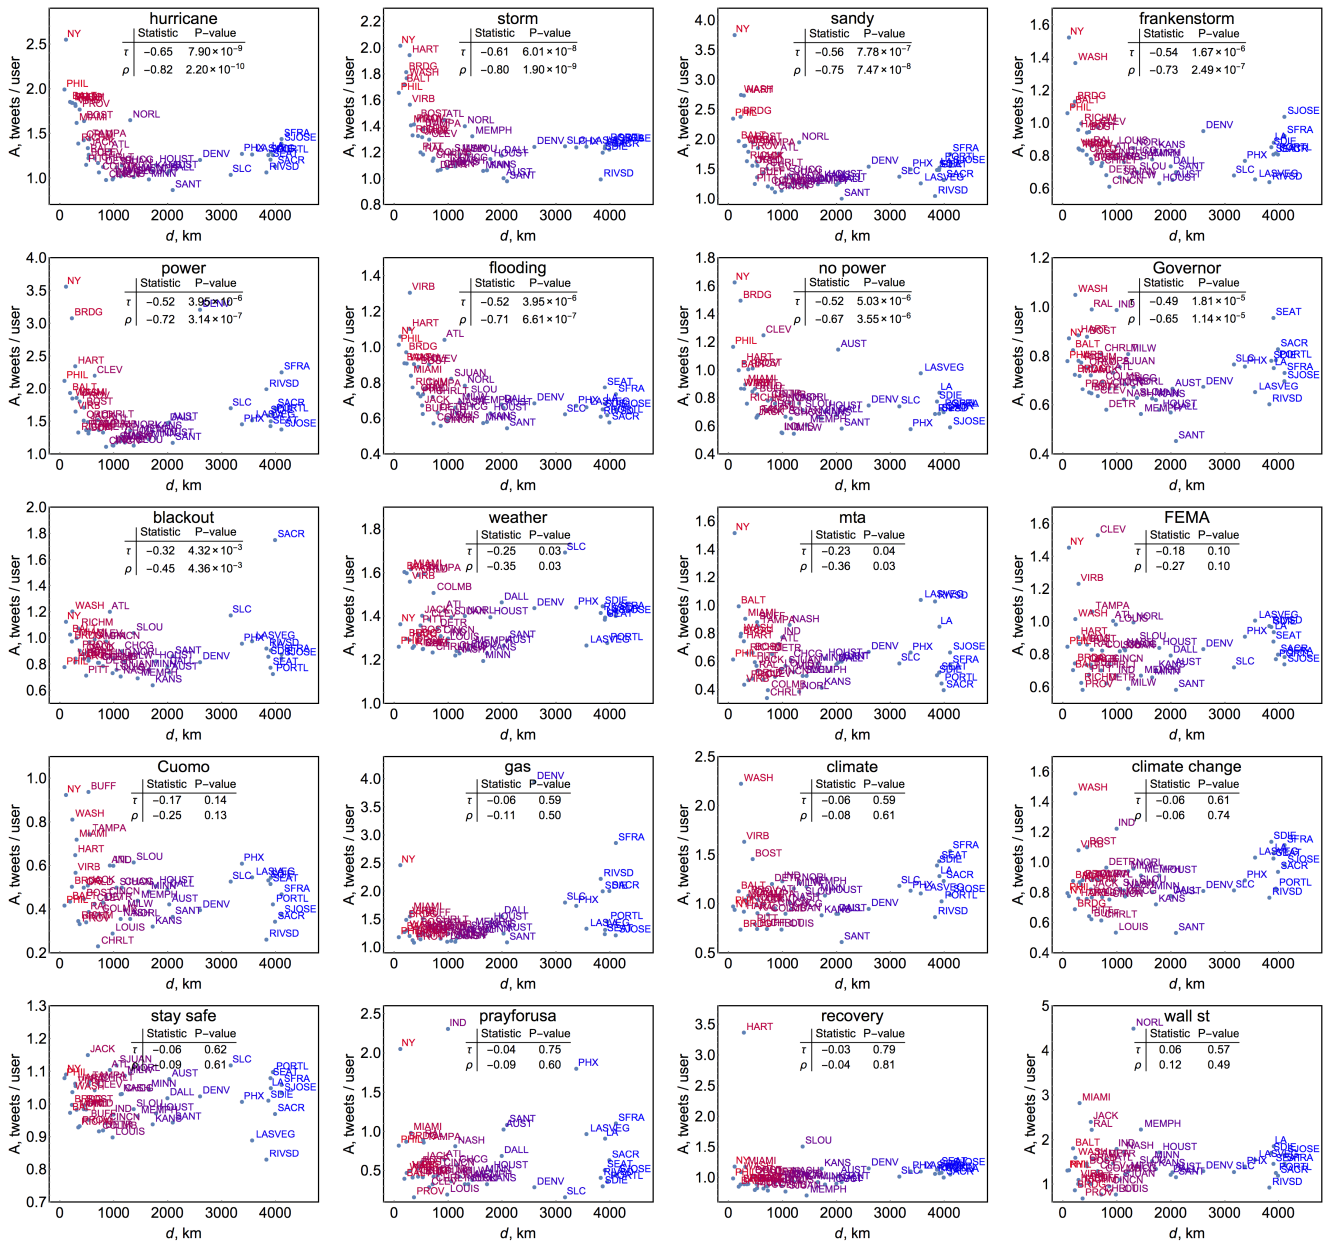

**Figure S1 Normalized local activity on the topic as a function of distance to the hurricane path.** For the words strongly related to Hurricane Sandy (top row) activity decreases with distance, and after the distance of 1200 – 1500 km proximity does not affect the level of activity. Because of this, and also because for some words (“gas”, “power”, “Governor”, etc.) trends for East and West coasts differ, we use rank correlation for East coast cities as a measure of relevance. The values of these correlation coefficients between activity and distance are shown in insets.

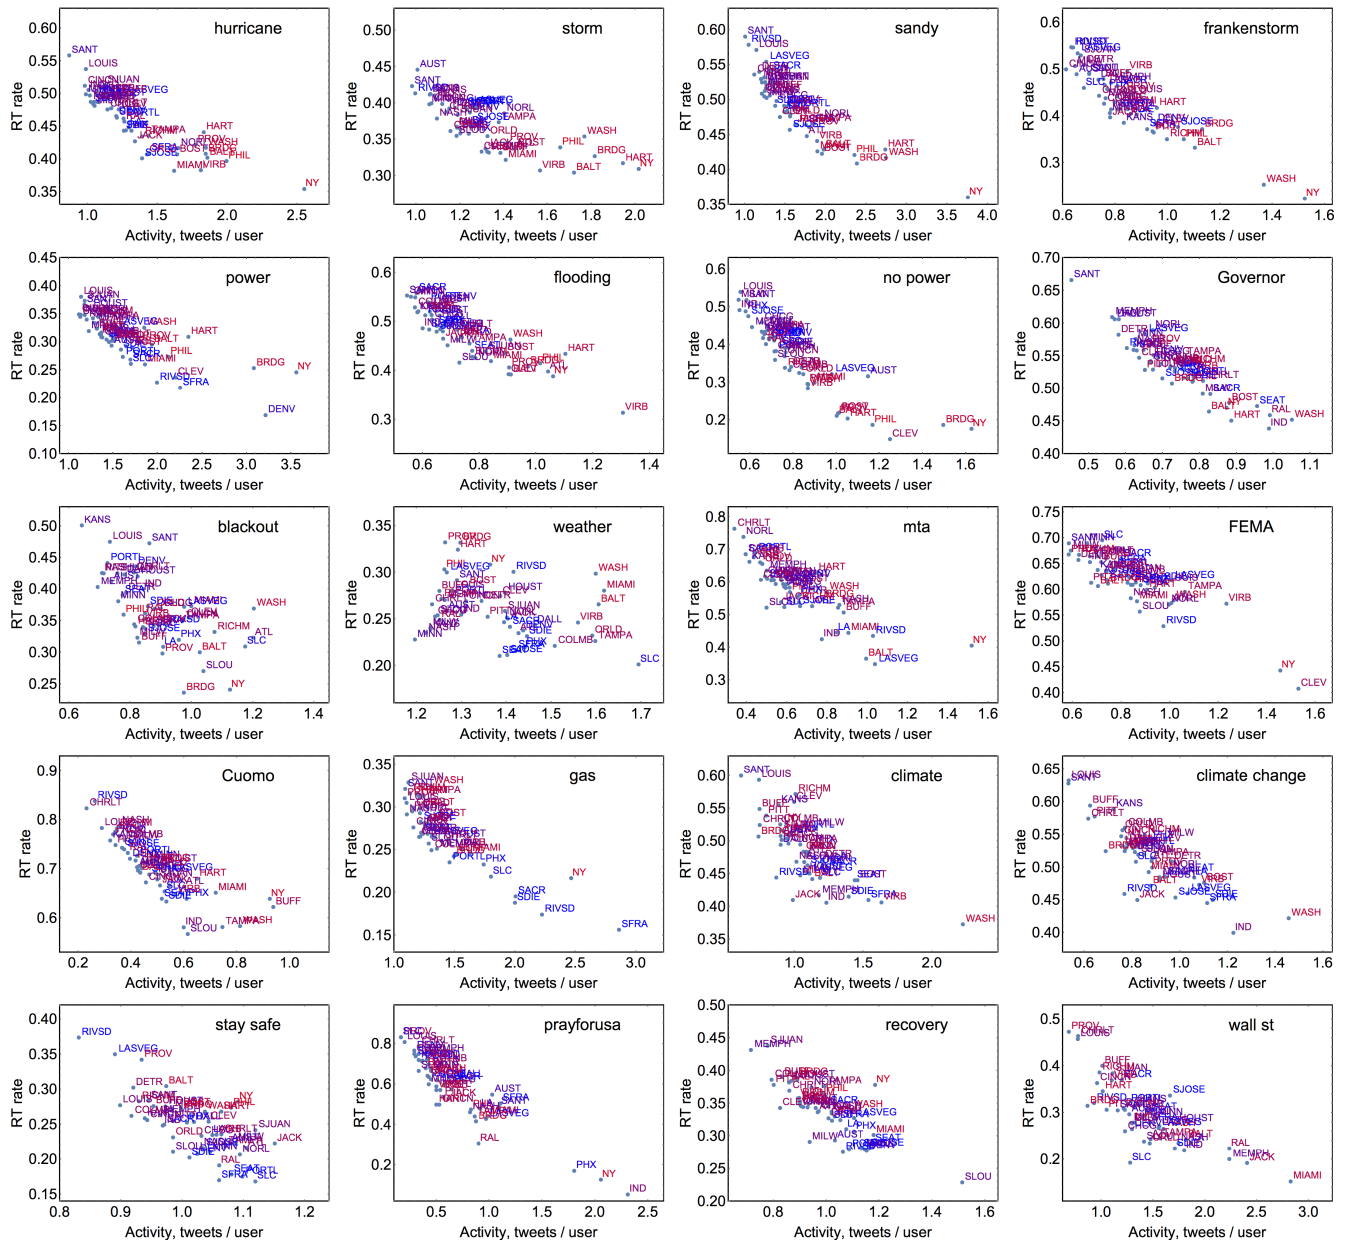

**Figure S2 Originality of the content, expressed through the fraction of retweets in the stream of messages.** The words are sorted by their relevance based on the strength of activity-proximity correlation, as in Fig S1. Most of the words show the inverse relationship between normalized activity and retweet rate. For the event-related keywords at the top this is more pronounced: cities follow the downward linear trend closely and affected places are concentrated at the “high activity/low retweet rate” end of the spectrum. Less relevant words demonstrate wider spread (“weather”, ”stay safe”) and/or uniform distribution of affected places along the downward trend (“climate change”).

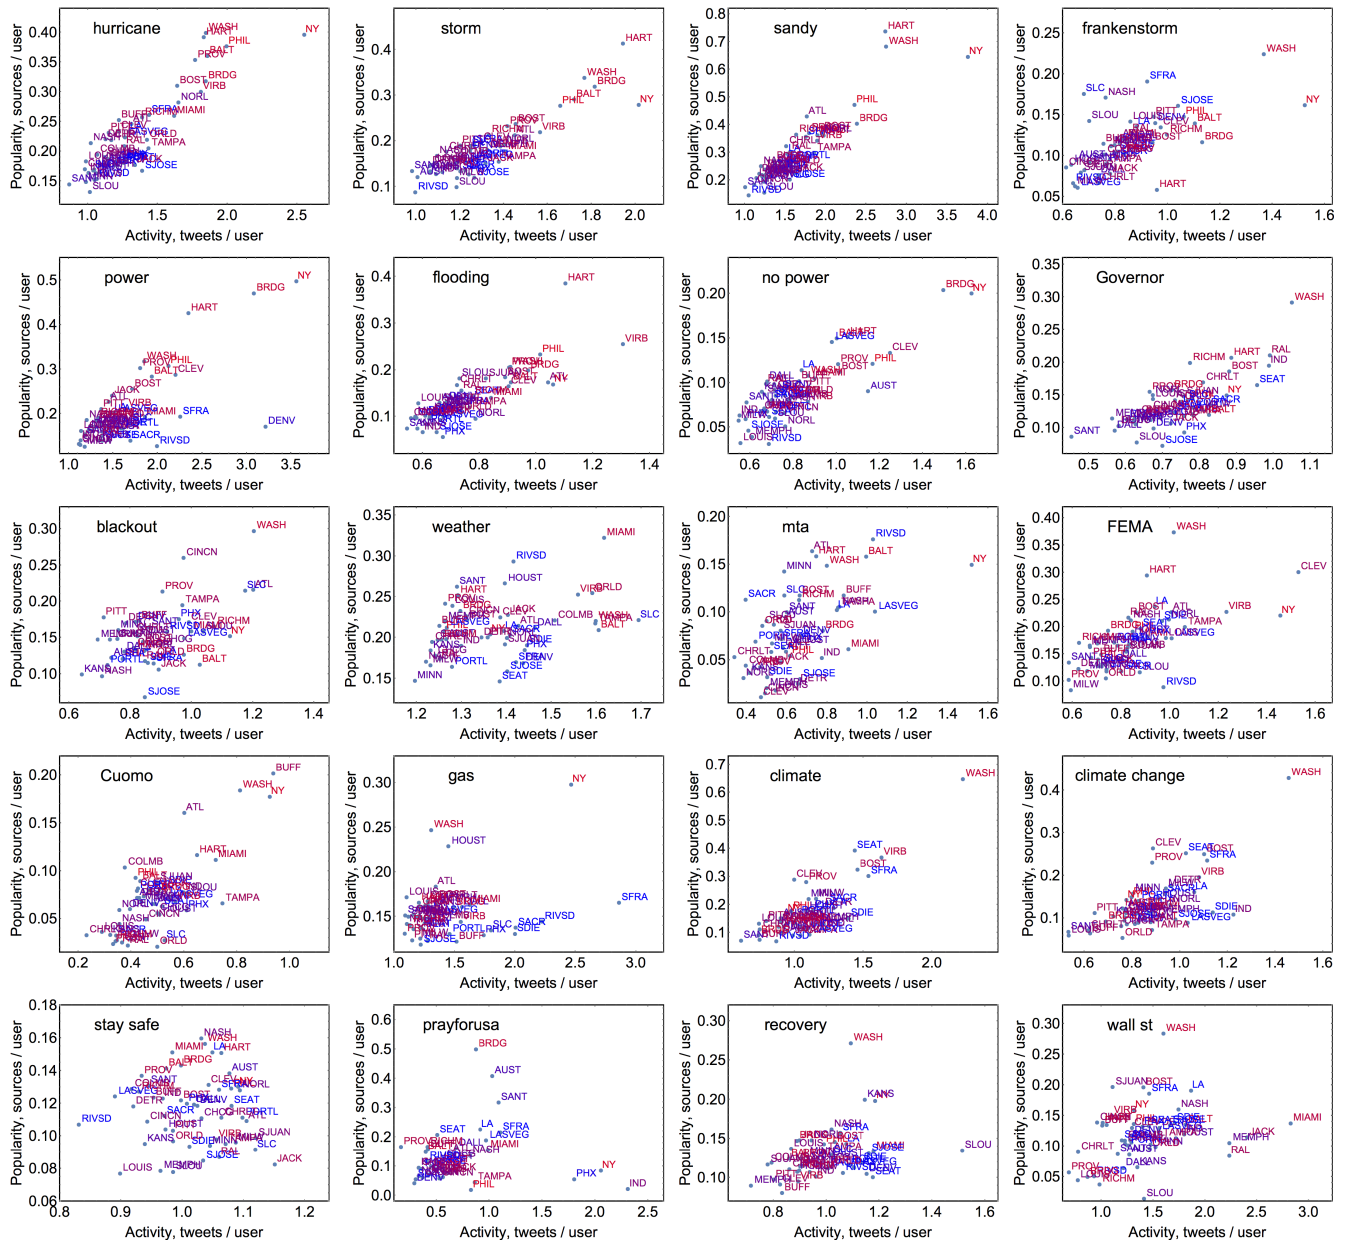

**Figure S3 Global popularity of local content.** Words are sorted, as in Figure S1, according to relevance based on the strength of activity-distance correlation for East Coast cities. Event-related keywords at the top show a strong linear relationship between activity and global popularity of messages generated locally. As relevance of the word to the disaster weakens, so does the correlation between activity and popularity.

**Table S2 Ranking of the keywords included into analysis according to strength of the correlation between the distance and activity for East Coast cities.** Event-related words on the top are used for further analysis of activity, including its relationship to damage.

| keyword        | Kendall rank |                      | Spearman rank |                       |
|----------------|--------------|----------------------|---------------|-----------------------|
|                | $\tau$       | P-value              | $\rho$        | P-value               |
| hurricane      | -0.65        | $7.90 \cdot 10^{-9}$ | -0.82         | $2.20 \cdot 10^{-10}$ |
| storm          | -0.61        | $6.01 \cdot 10^{-8}$ | -0.80         | $1.90 \cdot 10^{-9}$  |
| sandy          | -0.56        | $7.78 \cdot 10^{-7}$ | -0.75         | $7.47 \cdot 10^{-8}$  |
| frankenstorm   | -0.54        | $1.67 \cdot 10^{-6}$ | -0.73         | $2.49 \cdot 10^{-7}$  |
| power          | -0.52        | $3.95 \cdot 10^{-6}$ | -0.72         | $3.14 \cdot 10^{-7}$  |
| flooding       | -0.52        | $3.95 \cdot 10^{-6}$ | -0.71         | $6.61 \cdot 10^{-7}$  |
| no power       | -0.52        | $5.03 \cdot 10^{-6}$ | -0.67         | $3.55 \cdot 10^{-6}$  |
| Governor       | -0.49        | $1.81 \cdot 10^{-5}$ | -0.65         | $1.14 \cdot 10^{-5}$  |
| blackout       | -0.32        | $4.32 \cdot 10^{-3}$ | -0.45         | $4.36 \cdot 10^{-3}$  |
| weather        | -0.25        | 0.03                 | -0.35         | 0.03                  |
| mta            | -0.23        | 0.04                 | -0.36         | 0.03                  |
| FEMA           | -0.18        | 0.10                 | -0.27         | 0.10                  |
| Cuomo          | -0.17        | 0.14                 | -0.25         | 0.13                  |
| gas            | -0.06        | 0.59                 | -0.11         | 0.50                  |
| climate        | -0.06        | 0.59                 | -0.08         | 0.61                  |
| climate change | -0.06        | 0.61                 | -0.06         | 0.74                  |
| stay safe      | -0.06        | 0.62                 | -0.09         | 0.61                  |
| prayforusa     | -0.04        | 0.75                 | -0.09         | 0.60                  |
| recovery       | -0.03        | 0.79                 | -0.04         | 0.81                  |
| wall st        | 0.06         | 0.57                 | 0.12          | 0.49                  |

**Table S3 Activity-damage correlations across keywords, in order of decreasing strength.** Note that event-related keywords (on the basis of activity-distance relationship) are also most predictive of damage. For the final analysis we use the following selection: “sandy”, ”hurricane”, ”storm”, ”power”, “FEMA” and “flooding”.

| keyword        | ZCTAs | Kendall rank |                       | Spearman rank |                       | Pearson  |                       |
|----------------|-------|--------------|-----------------------|---------------|-----------------------|----------|-----------------------|
|                |       | $\tau$       | P-value               | $\rho_s$      | P-value               | $\rho_p$ | P-value               |
| sandy          | 469   | 0.38         | $3.07 \cdot 10^{-35}$ | 0.54          | $8.17 \cdot 10^{-37}$ | 0.61     | $2.52 \cdot 10^{-49}$ |
| hurricane      | 420   | 0.33         | $3.29 \cdot 10^{-24}$ | 0.47          | $1.27 \cdot 10^{-24}$ | 0.53     | $1.04 \cdot 10^{-31}$ |
| power          | 496   | 0.33         | $3.23 \cdot 10^{-28}$ | 0.46          | $1.35 \cdot 10^{-27}$ | 0.50     | $1.19 \cdot 10^{-32}$ |
| no power       | 395   | 0.28         | $1.06 \cdot 10^{-16}$ | 0.40          | $8.27 \cdot 10^{-17}$ | 0.43     | $4.42 \cdot 10^{-19}$ |
| flooding       | 74    | 0.28         | $4.90 \cdot 10^{-4}$  | 0.40          | $4.06 \cdot 10^{-4}$  | 0.50     | $5.49 \cdot 10^{-6}$  |
| FEMA           | 122   | 0.24         | $6.49 \cdot 10^{-5}$  | 0.34          | $1.33 \cdot 10^{-4}$  | 0.33     | $2.13 \cdot 10^{-4}$  |
| storm          | 386   | 0.23         | $1.10 \cdot 10^{-11}$ | 0.34          | $7.99 \cdot 10^{-12}$ | 0.36     | $3.17 \cdot 10^{-13}$ |
| gas            | 455   | 0.16         | $1.62 \cdot 10^{-7}$  | 0.25          | $8.11 \cdot 10^{-8}$  | 0.30     | $1.06 \cdot 10^{-10}$ |
| blackout       | 113   | 0.14         | 0.02                  | 0.21          | 0.03                  | 0.17     | 0.07                  |
| recovery       | 98    | 0.14         | 0.04                  | 0.20          | 0.05                  | 0.30     | $2.41 \cdot 10^{-3}$  |
| frankenstorm   | 37    | 0.17         | 0.14                  | 0.29          | 0.08                  | 0.18     | 0.29                  |
| climate        | 33    | 0.18         | 0.14                  | 0.27          | 0.13                  | 0.30     | 0.09                  |
| Governor       | 135   | 0.08         | 0.17                  | 0.12          | 0.16                  | 0.18     | 0.04                  |
| Cuomo          | 27    | 0.18         | 0.19                  | 0.28          | 0.15                  | 0.44     | 0.02                  |
| stay safe      | 86    | 0.08         | 0.28                  | 0.10          | 0.37                  | 0.10     | 0.38                  |
| weather        | 369   | 0.03         | 0.39                  | 0.04          | 0.40                  | 0.14     | $7.52 \cdot 10^{-3}$  |
| climate change | 22    | 0.10         | 0.52                  | 0.14          | 0.53                  | 0.02     | 0.95                  |
| mta            | 19    | 0.09         | 0.60                  | 0.11          | 0.65                  | 0.18     | 0.46                  |
| prayforusa     | 3     | 0.33         | 0.60                  | 0.50          | 0.67                  | 0.59     | 0.60                  |
| wall st        | 26    | 0.00         | 0.98                  | 0.01          | 0.96                  | -0.01    | 0.95                  |



Rank discrepancy of ZCTA  
in distributions of activity and damage

Rank discrepancy of ZCTA  
in distributions of sentiment and damage

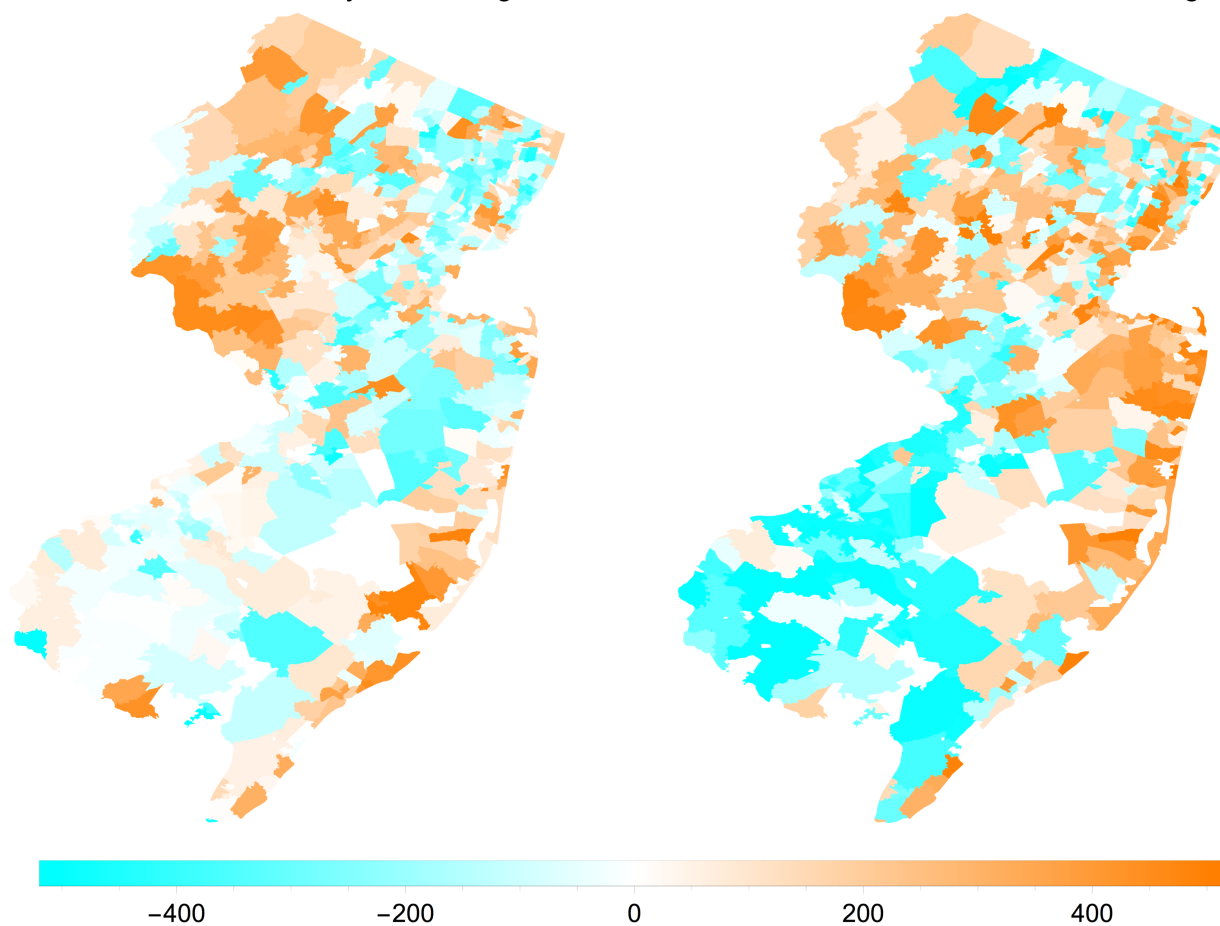

**Figure S4 Comparison of predictive capacity of activity and sentiment.** The figure maps all zipcode tabulation areas shaded by color, with saturation reflecting discrepancy of the area's rank in two corresponding distributions. For instance, if a particular zipcode is 5<sup>th</sup> in the ranking of activity, but 100<sup>th</sup> in the ranking of damage the discrepancy is equal to 95. Discrepancies are normalized by the maximum observed deviation. The stronger the correlation is between the distributions the more uniform and light the map would be, as is the case for activity-vs.-damage map on the left.

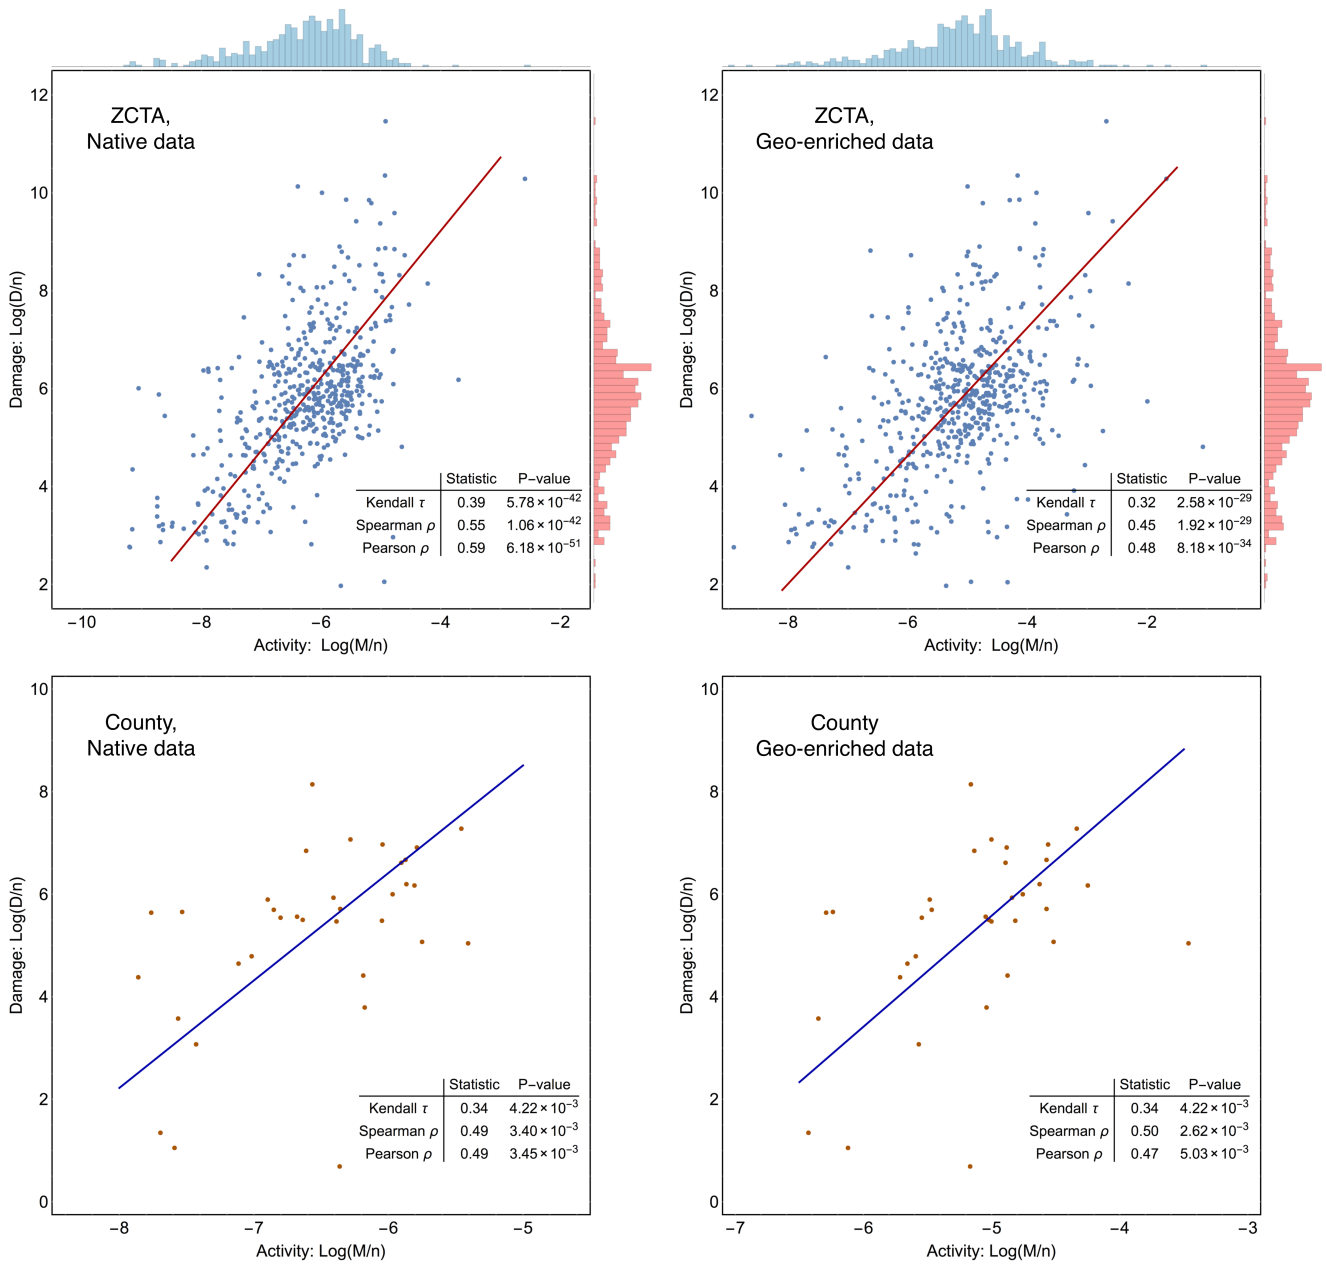

**Figure S5 Comparison of the activity-damage correlation strength for different precision of geo-location.** The figure shows that the correlation is strongest for fine-resolution (ZCTA) analysis of natively geo-coded data (compare the top left panel versus top right panel with corresponding analysis of geo-enriched data). At the coarser spatial resolution of counties the precision of geo-location and amount of data has little effect. We conclude that natively geo-coded data gives the best predictive power for damage assessment; however, in the absence of sufficient traffic (sparsely populated areas, or small-scale disasters) using geo-enrichment gives a viable analysis option.

**Table S4 Effect of normalization variable choice on the strength of activity-damage relationship (ZCTA-resolution).**

| Correlation measure | Variables normalized by ... |                       |                          |                       |
|---------------------|-----------------------------|-----------------------|--------------------------|-----------------------|
|                     | ... Census population       |                       | ... "Twitter population" |                       |
|                     | statistic                   | P-value               | statistic                | P-value               |
| Kendall $\tau_K$    | 0.39                        | $5.78 \cdot 10^{-42}$ | 0.36                     | $7.88 \cdot 10^{-36}$ |
| Spearman $\rho_S$   | 0.55                        | $1.06 \cdot 10^{-42}$ | 0.51                     | $8.07 \cdot 10^{-36}$ |
| Pearson $\rho_P$    | 0.59                        | $6.18 \cdot 10^{-51}$ | 0.57                     | $2.48 \cdot 10^{-47}$ |

**Table S5 County level estimates of damage: modeling (HazuS-MH) and *ex-post* data on insurance and FEMA Individual Assistance grants.**

| County      | Population | Tweets | Users | Damage estimates     |               |
|-------------|------------|--------|-------|----------------------|---------------|
|             |            |        |       | <i>ex-post</i> , \$M | HazuS-MH, \$M |
| Atlantic    | 275422     | 388    | 216   | 954.                 | 1630.         |
| Bergen      | 918888     | 2589   | 1056  | 729.                 | 1070.         |
| Burlington  | 451336     | 405    | 246   | 54.6                 | 164.          |
| Camden      | 513539     | 275    | 190   | 147.                 | 103.          |
| Cape May    | 96304      | 167    | 98    | 29.3                 | 740.          |
| Cumberland  | 157785     | 61     | 47    | 12.7                 | 128.          |
| Essex       | 787744     | 1871   | 859   | 844.                 | 375.          |
| Gloucester  | 289586     | 172    | 120   | 6.29                 | 151.          |
| Hudson      | 652302     | 1963   | 838   | 314.                 | 3600.         |
| Middlesex   | 823041     | 2334   | 950   | 406.                 | 776.          |
| Monmouth    | 629384     | 2686   | 922   | 919.                 | 1930.         |
| Ocean       | 580470     | 1780   | 570   | 587.                 | 3240.         |
| Passaic     | 502885     | 1035   | 429   | 41.8                 | 34.2          |
| Salem       | 65774      | 28     | 19    | 18.6                 | 167.          |
| Union       | 543976     | 1734   | 642   | 87.2                 | 395.          |
| Bronx       | 1408473    | 732    | 421   | 50.6                 | 635.          |
| Kings       | 2565635    | 2855   | 1662  | 660.                 | 5470.         |
| Nassau      | 1349233    | 2525   | 1042  | 1590.                | 6860.         |
| New York    | 1619090    | 7259   | 4022  | 252.                 | 4820.         |
| Orange      | 374512     | 305    | 176   | 39.2                 | 22.7          |
| Putnam      | 99607      | 172    | 72    | 0.2                  | 0.405         |
| Queens      | 2272771    | 2299   | 1334  | 832.                 | 3650.         |
| Richmond    | 470728     | 1286   | 481   | 353.                 | 1880.         |
| Rockland    | 317757     | 400    | 188   | 83.3                 | 86.8          |
| Suffolk     | 1499273    | 2472   | 1046  | 569.                 | 2720.         |
| Ulster      | 181791     | 92     | 52    | 0.524                | 8.03          |
| Westchester | 961670     | 1262   | 640   | 237.                 | 1320.         |

**Table S6 Strength of activity-damage correlations for different damage estimates.**

| Correlation measure | Damage is estimated ...    |                      |                                    |                      |
|---------------------|----------------------------|----------------------|------------------------------------|----------------------|
|                     | ... by modeling (Hazes-MH) |                      | ... from insurance and FEMA claims |                      |
|                     | statistic                  | P-value              | statistic                          | P-value              |
| Kendall $\tau_K$    | 0.28                       | $3.9 \cdot 10^{-2}$  | 0.37                               | $7.16 \cdot 10^{-3}$ |
| Spearman $\rho_S$   | 0.44                       | $2.22 \cdot 10^{-2}$ | 0.53                               | $4.92 \cdot 10^{-3}$ |
| Pearson $\rho_P$    | 0.33                       | $8.84 \cdot 10^{-2}$ | 0.46                               | $1.55 \cdot 10^{-2}$ |

**Table S7 Predictive power of sentiment, analyzed at different spatial resolutions and normalized either by the area Census population or local Twitter user count (“Twitter population”).**

| Normalization       | Kendall $\tau$ for sentiment-damage relationship |         |           |         |
|---------------------|--------------------------------------------------|---------|-----------|---------|
|                     | ZCTA                                             |         | County    |         |
|                     | statistic                                        | P-value | statistic | P-value |
| Census population   | -0.031                                           | 0.294   | -0.28     | 0.018   |
| Twitter users count | -0.04                                            | 0.169   | -0.34     | 0.005   |

**Table S8 List of the disasters considered in the study with description of the damage data available for analysis.** The source of insurance data in every case is a financial regulatory department of the corresponding state’s government. We request the data using Open Public Records Act or Freedom of Information Act (OPRA or FOI). From all requests made, only New Jersey provided the data aggregated at ZCTA-level. New York and Arkansas provided county-level totals. Several states denied requests citing unavailability of data, or failed to respond. We did not request the data from the remaining states, as it became clear that majority of them are denied or aggregated coarsely. Therefore, in the main part of the manuscript damage analysis is performed at ZCTA-level for New Jersey, and county-level for New Jersey and New York. Additional analysis for other events relies only on FEMA data, in the absence of insurance data.

| Year | State       | FEMA declaration                                                    | OPRA/FOI          | Damage data |                   |        |
|------|-------------|---------------------------------------------------------------------|-------------------|-------------|-------------------|--------|
|      |             |                                                                     |                   | FEMA        | Insurance<br>ZCTA | county |
| 2012 | New York    | DR-4085: hurricane                                                  | total by counties | v           | -                 | v      |
|      | New Jersey  | DR-4086: hurricane                                                  | total by ZCTAs    | v           | v                 | v      |
| 2013 | Illinois    | DR-4116: severe storms, straight-line winds and flooding            | -                 | v           | -                 | -      |
|      | Oklahoma    | DR-4117: severe storms and tornadoes                                | -                 | v           | -                 | -      |
|      | Alaska      | DR-4122: flooding                                                   | -                 | v           | -                 | -      |
|      | Colorado    | DR-4145: severe storms, flooding, landslides and mudslides          | -                 | v           | -                 | -      |
|      | Illinois    | DR-4157: severe storms, straight-line winds and tornadoes           | -                 | v           | -                 | -      |
| 2014 | Washington  | DR-4168: flooding and mudslides                                     | no data           | v           | -                 | -      |
|      | Arkansas    | DR-4174: severe storms, tornadoes and flooding                      | total by counties | v           | -                 | v      |
|      | Mississippi | DR-4175: severe storms, tornadoes and flooding                      | no response       | v           | -                 | -      |
|      | Alabama     | DR-4176: severe storms, tornadoes, straight-line winds and flooding | no response       | v           | -                 | -      |
|      | Florida     | DR-4177: severe storms, tornadoes, straight-line winds and flooding | no data           | v           | -                 | -      |
|      | California  | DR-4193: earthquake                                                 | no response       | v           | -                 | -      |
|      | Michigan    | DR-4195: severe storms and flooding                                 | no data           | v           | -                 | -      |

**Table S9 The effect of the activity threshold filter on the strength of relationship between Twitter activity and damage.** To minimize the potential confounding effect of media coverage and capture the activity of average users we implement the following steps. First, we use natively geocoded messages, leaving out media accounts themselves for the lack of coordinates, along with the primary form of response to their messages (retweets are not geocoded). Second, we remove large clusters of stationary messages. Finally, we filter messages by the threshold in the total activity (removing the messages from accounts that exceed the threshold). Results presented below demonstrate that our findings hold even for users who only post one message.

|                   | Activity threshold |      |      |      |      |      |
|-------------------|--------------------|------|------|------|------|------|
|                   | 100                | 50   | 20   | 10   | 5    | 1    |
| Kendall $\tau_K$  | 0.39               | 0.40 | 0.40 | 0.41 | 0.39 | 0.34 |
| Spearman $\rho_S$ | 0.55               | 0.55 | 0.55 | 0.56 | 0.54 | 0.48 |
| Pearson $\rho_P$  | 0.59               | 0.59 | 0.59 | 0.60 | 0.57 | 0.50 |

**Table S10 Mutual correlations between sentiment metrics on the level of individual messages.**

|                      | <b>Topsy</b> | <b>LIWC</b> | <b>SentiStrength</b> |
|----------------------|--------------|-------------|----------------------|
| <b>Topsy</b>         | 1.00         | 0.68        | 0.53                 |
| <b>LIWC</b>          |              | 1.00        | 0.60                 |
| <b>SentiStrength</b> |              |             | 1.00                 |

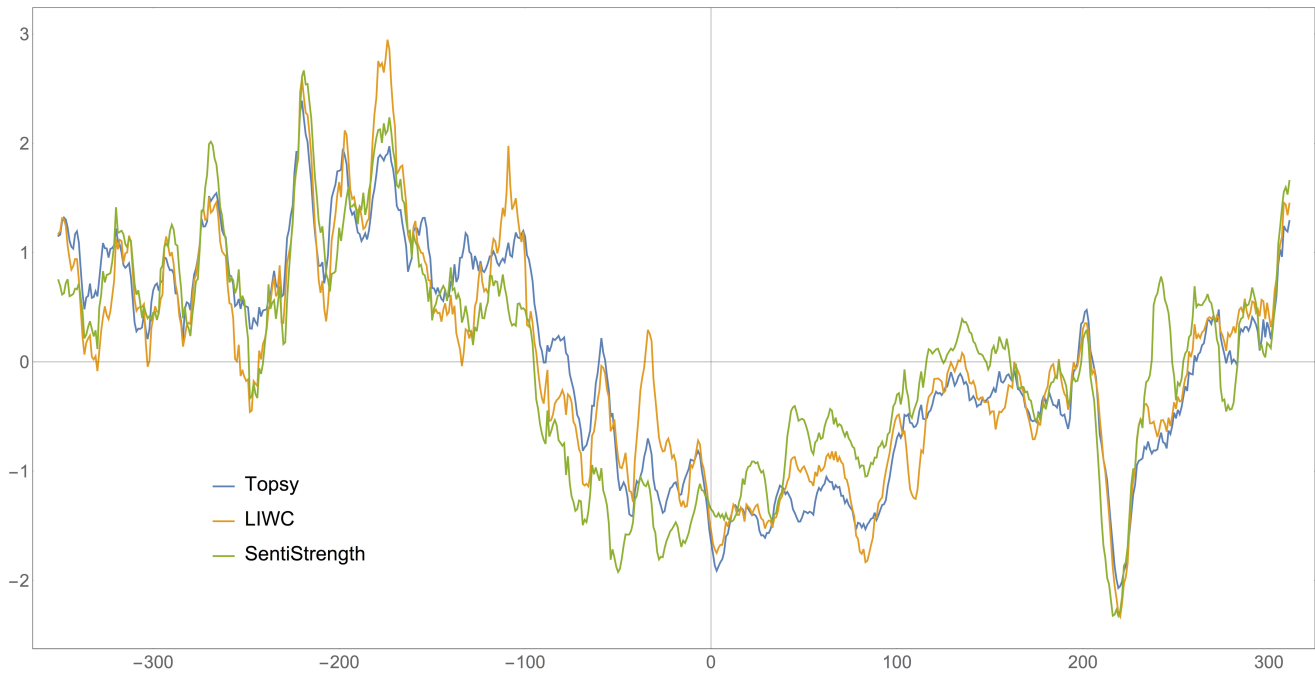

**Figure S6 Average sentiment trends over time – comparison between sentiment metrics.** All of the metrics reliably track the evolution of aggregate mood over time, as demonstrated by the trends for mean sentiment of all messages aggregated into hourly bins (raw scores for each method are rescaled and standardized).

**Table S11 Top-ranking words by frequency of occurrence in positive and negative messages.** Messages are grouped by sentiment scores; filtered to delete URLs, hashtags and usernames, converted to lowercase, and then word frequency analysis is performed. Top-30 most frequently occurring words in the positive and negative categories are presented below.

| <b>Positive messages</b> |                 | <b>Negative messages</b> |                 |
|--------------------------|-----------------|--------------------------|-----------------|
| <b>Word</b>              | <b>Rate (%)</b> | <b>Word</b>              | <b>Rate (%)</b> |
| power                    | 5.15            | power                    | 6.82            |
| hurricane                | 3.68            | hurricane                | 3.33            |
| storm                    | 2.17            | storm                    | 1.86            |
| good                     | 1.39            | lost                     | 1.00            |
| like                     | 1.34            | shit                     | 0.99            |
| lol                      | 1.17            | fuck                     | 0.99            |
| hope                     | 0.97            | bad                      | 0.67            |
| thanks                   | 0.92            | bitch                    | 0.49            |
| safe                     | 0.92            | damn                     | 0.42            |
| thank                    | 0.81            | lose                     | 0.40            |
| love                     | 0.78            | crazy                    | 0.37            |
| great                    | 0.55            | like                     | 0.33            |
| happy                    | 0.47            | dark                     | 0.27            |
| ok                       | 0.46            | sucks                    | 0.23            |
| best                     | 0.38            | come                     | 0.23            |
| please                   | 0.37            | worst                    | 0.22            |
| lmao                     | 0.35            | hell                     | 0.20            |
| fun                      | 0.31            | hate                     | 0.18            |
| come                     | 0.29            | charge                   | 0.18            |
| haha                     | 0.27            | worse                    | 0.18            |
| nice                     | 0.26            | mad                      | 0.18            |
| calm                     | 0.25            | wtf                      | 0.17            |
| wow                      | 0.24            | outside                  | 0.17            |
| glad                     | 0.23            | fucked                   | 0.17            |
| lucky                    | 0.21            | dead                     | 0.15            |
| awesome                  | 0.21            | scary                    | 0.15            |
| perfect                  | 0.19            | emergency                | 0.13            |
| fine                     | 0.18            | wow                      | 0.13            |
| strong                   | 0.17            | ill                      | 0.13            |
| party                    | 0.16            | live                     | 0.13            |



**Table S12 Sentiment as a predictor of damage, comparison between metrics.** In general, analysis by each method shows that a) sentiment at the fine resolution of ZCTAs is not predictive of damage (low ranking correlation and P-value >0.05); b) for the coarser spatial aggregation (counties) there is a weak relationship between sentiment and damage, which we report in the manuscript for the method with the highest statistical significance (Topsy).

|               | <b>ZCTA</b>      |         | <b>County</b>    |              |
|---------------|------------------|---------|------------------|--------------|
|               | Kendall $\tau_K$ | P-value | Kendall $\tau_K$ | P-value      |
| <b>Topsy</b>  | -0.031           | 0.294   | <b>-0.283</b>    | <b>0.018</b> |
| LIWC          | 0.010            | 0.738   | -0.144           | 0.230        |
| SentiStrength | 0.056            | 0.054   | -0.023           | 0.847        |
